# Supplementary material
Source: PubMed Central journal article supplement (PMC3717226)
Supplement: tjp0591-3253-SD1.pdf [file tjp0591-3253-SD1.pdf]

SUPPLEMENTARY FIGURE 1

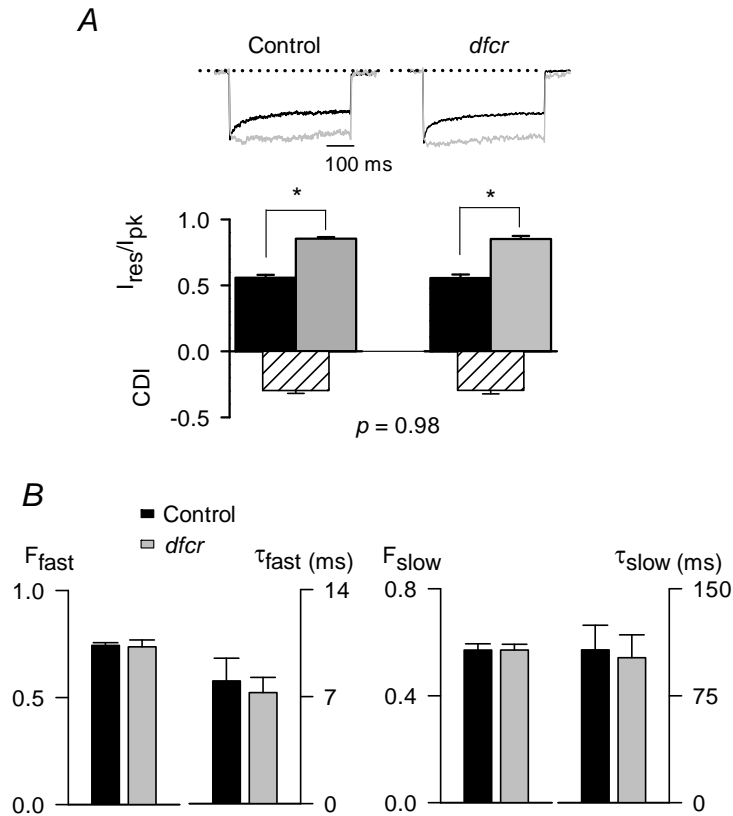

**Ca<sub>v</sub>1.3 CDI is not different in control and *dfcr* IHCs.** *A*, Top, representative traces for  $I_{Ca}$  (black) and  $I_{Ba}$  (grey) normalized and overlaid for comparison in control and *dfcr* IHCs (p16-18). Currents were evoked by 300-ms pulses to -20 mV from -90 mV. Bottom, inactivation was calculated as the current amplitude at the end of the pulse normalized to the peak current amplitude ( $I_{res}/I_{pk}$ ) and is shown for  $I_{Ca}$  and  $I_{Ba}$ . CDI represents the difference in  $I_{res}/I_{pk}$  for  $I_{Ca}$  and the mean  $I_{res}/I_{pk}$  for  $I_{Ba}$ . \*,  $p < 0.001$  by t-test. *B*, Parameters obtained from double exponential fits of current traces obtained as in *A*.
